# Supplementary material for: Novel pooling strategy with sample concentration for screening of SARS-CoV-2
Source: HighWire-hosted journal article supplement (doi:10.1136/jclinpath-2021-207579), 2021-12-06
Supplement: jclinpath-2021-207579supp001_data_supplement.pdf [file jclinpath-2021-207579supp001_data_supplement.pdf]

Table S1. Comparison of Ct values for individual positive samples compared to traditional sample pooling (TSP) strategy and sample pooling concentration (SPC) strategy<sup>a</sup>

| Pool <sup>b</sup> | 3-sample pooling |              |                   |        |                   | 8-sample pooling |              |                   |        |                   |
|-------------------|------------------|--------------|-------------------|--------|-------------------|------------------|--------------|-------------------|--------|-------------------|
|                   | Individual Ct    | TSP Ct       | Δ Ct <sup>c</sup> | SPC Ct | Δ Ct <sup>c</sup> | Individual Ct    | TSP Ct       | Δ Ct <sup>c</sup> | SPC Ct | Δ Ct <sup>c</sup> |
| 1                 | 27.56            | 29.17        | 1.18              | 27.99  | 0.43              | 28.55            | 31.23        | 2.68              | 29.05  | 0.50              |
| 2                 | 29.06            | 30.27        | 1.21              | 28.27  | -0.79             | 29.50            | 32.32        | 2.82              | 29.99  | 0.49              |
| 3                 | 28.31            | 30.53        | 2.22              | 28.38  | 0.07              | 29.67            | 32.16        | 2.49              | 30.04  | 0.37              |
| 4                 | 28.66            | 29.98        | 1.32              | 27.95  | -0.71             | 29.52            | 31.52        | 2.00              | 29.29  | -0.23             |
| 5                 | 28.62            | 30.01        | 1.39              | 28.84  | 0.22              | 28.85            | 31.32        | 2.47              | 29.34  | 0.49              |
| 6                 | 33.33            | 35.09        | 1.76              | 33.65  | 0.32              | 29.51            | 31.57        | 2.06              | 29.24  | -0.27             |
| 7                 | 33.29            | 35.14        | 1.85              | 33.72  | 0.43              | 33.21            | 35.34        | 2.13              | 33.87  | 0.66              |
| 8                 | 34.26            | 36.36        | 2.10              | 34.24  | -0.02             | 33.39            | 35.28        | 1.89              | 33.72  | 0.33              |
| 9                 | 34.86            | 36.16        | 1.30              | 35.49  | 0.63              | 34.67            | 37.41        | 2.74              | 35.07  | 0.40              |
| 10                | 36.68            | 38.04        | 1.36              | 37.01  | 0.33              | 34.66            | 36.54        | 1.88              | 35.37  | 0.71              |
| 11                | 36.22            | 38.03        | 1.81              | 36.79  | 0.57              | 36.38            | 39.17        | 2.79              | 36.07  | -0.31             |
| 12                | 37.44            | <b>40.00</b> | 2.56              | 37.24  | -0.20             | 36.76            | <b>40.00</b> | 3.24              | 36.87  | 0.11              |
| 13                | 27.99            | 28.99        | N/A               | 27.72  | N/A               | 28.55            | 30.50        | N/A               | 27.89  | N/A               |
|                   | 28.66            |              |                   |        |                   | 28.85            |              |                   |        |                   |
| 14                | 33.33            | 34.16        | N/A               | 32.63  | N/A               | 29.67            | 32.19        | N/A               | 30.03  | N/A               |
|                   | 34.26            |              |                   |        |                   | 37.41            |              |                   |        |                   |
| 15                | 36.68            | <b>40.00</b> | N/A               | 37.51  | N/A               | 33.21            | 35.57        | N/A               | 33.25  | N/A               |
|                   | 37.44            |              |                   |        |                   | 36.76            |              |                   |        |                   |
| 16                | 29.06            | 29.41        | N/A               | 27.99  | N/A               | 29.50            | 30.94        | N/A               | 29.03  | N/A               |
|                   | 28.66            |              |                   |        |                   | 29.52            |              |                   |        |                   |
|                   | 33.33            |              |                   |        |                   | 33.21            |              |                   |        |                   |

|    |       |       |     |       |     |       |       |     |       |     |
|----|-------|-------|-----|-------|-----|-------|-------|-----|-------|-----|
| 17 | 33.29 | 34.38 | N/A | 33.09 | N/A | 33.39 | 36.61 | N/A | 34.27 | N/A |
|    | 34.26 |       |     |       |     | 34.67 |       |     |       |     |
|    | 37.44 |       |     |       |     | 36.76 |       |     |       |     |
| 18 | 36.68 | 37.43 | N/A | 36.36 | N/A | 36.38 | 38.08 | N/A | 35.54 | N/A |
|    | 36.22 |       |     |       |     | 36.76 |       |     |       |     |
|    | 37.44 |       |     |       |     | 34.67 |       |     |       |     |

<sup>a</sup>Ct: cycle threshold; Boldface type indicates samples that were missed when pooled; N/A: not applicable.

<sup>b</sup>pools 1-12 containing one positive sample, pools 13-15 containing two positive samples, pools 16-18 containing three positive samples.

<sup>c</sup>Values represent the difference between Ct values of the pooled group and corresponding individual positive sample.
